# Supplementary material
Source: MDPI journal article supplement (https://www.mdpi.com/2075-163X/12/10/1201)
Supplement: s1 [file s1]

**Table S1.** The representative electron-microprobe analyses for main minerals of samples across Susong Complex rocks and Zhangbaling Group.

| Sample                         | TS028  |       |       | TS031 |        |       | TS032  |       |       | TS049  |        |       | TS051  |        |       | TS053 |       |       |
|--------------------------------|--------|-------|-------|-------|--------|-------|--------|-------|-------|--------|--------|-------|--------|--------|-------|-------|-------|-------|
| Mineral                        | Grt    | Pl    | Bt    | Grt   | Pl     | Bt    | Grt    | Pl    | Bt    | Grt    | Pl     | Bt    | Grt    | Pl     | Bt    | Grt   | Pl    | Bt    |
| SiO <sub>2</sub>               | 37.24  | 63.92 | 36.87 | 37.46 | 65.22  | 36.92 | 37.71  | 63.13 | 36.98 | 36.79  | 63.70  | 38.10 | 36.56  | 64.30  | 36.80 | 37.12 | 62.27 | 38.75 |
| TiO <sub>2</sub>               | 0.11   | 0.00  | 1.64  | 0.10  | 0.02   | 1.98  | 0.08   | 0.01  | 1.97  | 0.06   | 0.00   | 2.00  | 0.10   | 0.02   | 1.81  | 0.13  | 0.04  | 1.87  |
| Al <sub>2</sub> O <sub>3</sub> | 20.27  | 22.48 | 16.74 | 20.49 | 22.01  | 16.64 | 20.78  | 22.73 | 17.42 | 21.06  | 22.93  | 17.31 | 20.41  | 22.62  | 16.96 | 20.07 | 23.39 | 17.29 |
| FeO                            | 28.22  | 0.11  | 18.29 | 28.33 | 0.01   | 16.50 | 28.46  | 0.06  | 17.25 | 28.43  | 0.12   | 17.73 | 35.54  | 0.03   | 19.16 | 26.56 | 0.16  | 15.44 |
| Cr <sub>2</sub> O <sub>3</sub> | 0.00   | 0.00  | 0.08  | 0.00  | 0.00   | 0.19  | 0.00   | 0.00  | 0.13  | 0.00   | 0.00   | 0.03  | 0.00   | 0.00   | 0.06  | 0.00  | 0.00  | 0.04  |
| MnO                            | 2.90   | 0.03  | 0.07  | 1.24  | 0.01   | 0.11  | 0.65   | 0.00  | 0.10  | 0.45   | 0.00   | 0.08  | 0.44   | 0.00   | 0.04  | 3.47  | 0.02  | 0.09  |
| MgO                            | 1.07   | 0.00  | 10.71 | 1.21  | 0.02   | 11.78 | 1.63   | 0.00  | 11.49 | 1.24   | 0.00   | 10.84 | 1.95   | 0.00   | 10.82 | 1.75  | 0.00  | 12.40 |
| CaO                            | 10.63  | 3.82  | 0.05  | 11.07 | 3.70   | 0.07  | 11.53  | 4.10  | 0.00  | 12.07  | 4.75   | 0.00  | 5.01   | 4.03   | 0.00  | 10.23 | 4.87  | 0.00  |
| Na <sub>2</sub> O              | 0.00   | 9.39  | 0.14  | 0.02  | 9.40   | 0.12  | 0.00   | 9.14  | 0.20  | 0.05   | 8.93   | 0.17  | 0.07   | 9.28   | 0.16  | 0.03  | 8.83  | 0.31  |
| K <sub>2</sub> O               | 0.00   | 0.20  | 9.52  | 0.00  | 0.13   | 9.06  | 0.00   | 0.17  | 9.21  | 0.00   | 0.34   | 9.44  | 0.00   | 0.19   | 9.17  | 0.00  | 0.07  | 9.23  |
| Total                          | 100.45 | 99.94 | 94.12 | 99.91 | 100.51 | 93.37 | 100.83 | 99.36 | 94.76 | 100.15 | 100.77 | 95.69 | 100.09 | 100.47 | 94.97 | 99.36 | 99.64 | 95.40 |
| O                              | 12     | 8     | 11    | 12    | 8      | 11    | 12     | 8     | 11    | 12     | 8      | 11    | 12     | 8      | 11    | 12    | 8     | 11    |
| Si                             | 2.97   | 2.83  | 2.83  | 2.99  | 2.86   | 2.82  | 2.98   | 2.81  | 2.79  | 2.92   | 2.80   | 2.85  | 2.95   | 2.83   | 2.80  | 2.98  | 2.77  | 2.87  |
| Al                             | 1.91   | 1.17  | 1.51  | 1.93  | 1.14   | 1.50  | 1.93   | 1.19  | 1.55  | 1.97   | 1.19   | 1.52  | 1.94   | 1.17   | 1.52  | 1.90  | 1.23  | 1.51  |
| Cr                             | 0.00   | 0.00  | 0.01  | 0.00  | 0.00   | 0.01  | 0.00   | 0.00  | 0.01  | 0.00   | 0.00   | 0.00  | 0.00   | 0.00   | 0.00  | 0.00  | 0.00  | 0.00  |
| Fe <sup>3+</sup>               | 0.13   | 0.00  | 0.00  | 0.07  | 0.00   | 0.00  | 0.10   | 0.00  | 0.00  | 0.18   | 0.00   | 0.00  | 0.16   | 0.00   | 0.00  | 0.12  | 0.00  | 0.00  |
| Ti                             | 0.01   | 0.00  | 0.10  | 0.01  | 0.00   | 0.11  | 0.01   | 0.00  | 0.11  | 0.00   | 0.00   | 0.11  | 0.01   | 0.00   | 0.10  | 0.01  | 0.00  | 0.10  |
| Mg                             | 0.13   | 0.00  | 1.22  | 0.14  | 0.00   | 1.34  | 0.19   | 0.00  | 1.29  | 0.15   | 0.00   | 1.21  | 0.23   | 0.00   | 1.23  | 0.21  | 0.00  | 1.37  |
| Fe <sup>2+</sup>               | 1.75   | 0.00  | 1.17  | 1.83  | 0.00   | 1.06  | 1.78   | 0.00  | 1.09  | 1.71   | 0.00   | 1.11  | 2.24   | 0.00   | 1.22  | 1.66  | 0.01  | 0.96  |
| Mn                             | 0.20   | 0.00  | 0.00  | 0.08  | 0.00   | 0.01  | 0.04   | 0.00  | 0.01  | 0.03   | 0.00   | 0.01  | 0.03   | 0.00   | 0.00  | 0.24  | 0.00  | 0.01  |
| Ca                             | 0.91   | 0.18  | 0.00  | 0.95  | 0.17   | 0.01  | 0.98   | 0.20  | 0.00  | 1.03   | 0.22   | 0.00  | 0.43   | 0.19   | 0.00  | 0.88  | 0.23  | 0.00  |
| Na                             | 0.00   | 0.81  | 0.02  | 0.00  | 0.80   | 0.02  | 0.00   | 0.79  | 0.03  | 0.01   | 0.76   | 0.02  | 0.01   | 0.79   | 0.02  | 0.01  | 0.76  | 0.05  |
| K                              | 0.00   | 0.01  | 0.93  | 0.00  | 0.01   | 0.88  | 0.00   | 0.01  | 0.89  | 0.00   | 0.02   | 0.90  | 0.00   | 0.01   | 0.89  | 0.00  | 0.00  | 0.87  |
| Sum                            | 8.00   | 5.00  | 7.79  | 8.00  | 4.98   | 7.76  | 8.00   | 4.99  | 7.77  | 8.00   | 5.00   | 7.74  | 8.00   | 4.99   | 7.79  | 8.00  | 5.00  | 7.73  |

Continued Table S1

| Sample                         | TS056 |        |       | TS059  |       |       | TS060  |        |       | TS061 |        |       | TS065-3 |        |       | TS068 |       |       |
|--------------------------------|-------|--------|-------|--------|-------|-------|--------|--------|-------|-------|--------|-------|---------|--------|-------|-------|-------|-------|
| Mineral                        | Grt   | Pl     | Bt    | Grt    | Pl    | Bt    | Grt    | Pl     | Bt    | Grt   | Pl     | Bt    | Grt     | Pl     | Bt    | Grt   | Pl    | Bt    |
| SiO <sub>2</sub>               | 36.67 | 64.78  | 38.86 | 36.98  | 63.43 | 37.36 | 37.08  | 65.15  | 36.59 | 36.88 | 63.42  | 37.73 | 37.23   | 64.36  | 36.24 | 37.03 | 61.99 | 37.39 |
| TiO <sub>2</sub>               | 0.05  | 0.01   | 1.75  | 0.08   | 0.02  | 1.98  | 0.01   | 0.00   | 2.32  | 0.04  | 0.02   | 1.62  | 0.06    | 0.00   | 1.95  | 0.11  | 0.00  | 1.96  |
| Al <sub>2</sub> O <sub>3</sub> | 21.71 | 22.20  | 16.93 | 21.32  | 22.53 | 16.72 | 21.80  | 22.09  | 17.19 | 21.61 | 23.10  | 17.31 | 20.59   | 22.26  | 16.59 | 20.50 | 23.49 | 17.35 |
| FeO                            | 27.37 | 0.04   | 15.36 | 29.54  | 0.09  | 17.83 | 34.32  | 0.03   | 17.91 | 28.24 | 0.07   | 15.88 | 29.05   | 0.12   | 20.47 | 28.65 | 0.02  | 18.28 |
| Cr <sub>2</sub> O <sub>3</sub> | 0.03  | 0.00   | 0.01  | 0.01   | 0.00  | 0.08  | 0.01   | 0.00   | 0.05  | 0.01  | 0.00   | 0.04  | 0.00    | 0.00   | 0.13  | 0.00  | 0.00  | 0.37  |
| MnO                            | 2.09  | 0.01   | 0.11  | 0.49   | 0.00  | 0.22  | 0.54   | 0.00   | 0.07  | 0.74  | 0.00   | 0.05  | 0.08    | 0.00   | 0.05  | 2.58  | 0.00  | 0.06  |
| MgO                            | 2.20  | 0.00   | 13.27 | 1.63   | 0.02  | 11.61 | 2.62   | 0.00   | 10.90 | 2.07  | 0.02   | 12.63 | 1.46    | 0.00   | 9.79  | 2.13  | 0.01  | 10.15 |
| CaO                            | 9.83  | 3.85   | 0.00  | 10.20  | 3.96  | 0.01  | 4.98   | 3.67   | 0.00  | 10.30 | 4.81   | 0.00  | 11.80   | 3.57   | 0.01  | 8.76  | 5.07  | 0.00  |
| Na <sub>2</sub> O              | 0.02  | 9.48   | 0.29  | 0.05   | 9.12  | 0.14  | 0.03   | 9.68   | 0.21  | 0.02  | 8.89   | 0.27  | 0.01    | 9.55   | 0.15  | 0.01  | 8.64  | 0.18  |
| K <sub>2</sub> O               | 0.00  | 0.07   | 9.98  | 0.00   | 0.14  | 10.54 | 0.00   | 0.08   | 9.30  | 0.00  | 0.05   | 10.25 | 0.00    | 0.21   | 8.71  | 0.00  | 0.16  | 9.06  |
| Total                          | 99.97 | 100.43 | 96.56 | 100.28 | 99.31 | 96.47 | 101.38 | 100.71 | 94.54 | 99.91 | 100.38 | 95.78 | 100.28  | 100.07 | 94.07 | 99.76 | 99.38 | 94.79 |
| O                              | 12    | 8      | 11    | 12     | 8     | 11    | 12     | 8      | 11    | 12    | 8      | 11    | 12      | 8      | 11    | 12    | 8     | 11    |
| Si                             | 2.91  | 2.84   | 2.86  | 2.94   | 2.82  | 2.80  | 2.93   | 2.85   | 2.78  | 2.93  | 2.79   | 2.81  | 2.96    | 2.84   | 2.80  | 2.96  | 2.76  | 2.83  |
| Al                             | 2.03  | 1.15   | 1.47  | 1.99   | 1.18  | 1.48  | 2.03   | 1.14   | 1.54  | 2.02  | 1.20   | 1.52  | 1.93    | 1.16   | 1.51  | 1.93  | 1.23  | 1.55  |
| Cr                             | 0.00  | 0.00   | 0.00  | 0.00   | 0.00  | 0.00  | 0.00   | 0.00   | 0.00  | 0.00  | 0.00   | 0.00  | 0.00    | 0.00   | 0.01  | 0.00  | 0.00  | 0.02  |
| Fe <sup>3+</sup>               | 0.14  | 0.00   | 0.00  | 0.12   | 0.00  | 0.00  | 0.11   | 0.00   | 0.00  | 0.12  | 0.00   | 0.00  | 0.15    | 0.00   | 0.00  | 0.12  | 0.00  | 0.00  |
| Ti                             | 0.00  | 0.00   | 0.10  | 0.01   | 0.00  | 0.11  | 0.00   | 0.00   | 0.13  | 0.00  | 0.00   | 0.09  | 0.00    | 0.00   | 0.11  | 0.01  | 0.00  | 0.11  |
| Mg                             | 0.26  | 0.00   | 1.45  | 0.19   | 0.00  | 1.30  | 0.31   | 0.00   | 1.24  | 0.24  | 0.00   | 1.40  | 0.17    | 0.00   | 1.13  | 0.25  | 0.00  | 1.15  |
| Fe <sup>2+</sup>               | 1.68  | 0.00   | 0.94  | 1.84   | 0.00  | 1.12  | 2.16   | 0.00   | 1.14  | 1.76  | 0.00   | 0.99  | 1.78    | 0.01   | 1.32  | 1.79  | 0.00  | 1.16  |
| Mn                             | 0.14  | 0.00   | 0.01  | 0.03   | 0.00  | 0.01  | 0.04   | 0.00   | 0.01  | 0.05  | 0.00   | 0.00  | 0.01    | 0.00   | 0.00  | 0.18  | 0.00  | 0.00  |
| Ca                             | 0.84  | 0.18   | 0.00  | 0.87   | 0.19  | 0.00  | 0.42   | 0.17   | 0.00  | 0.88  | 0.23   | 0.00  | 1.00    | 0.17   | 0.00  | 0.75  | 0.24  | 0.00  |
| Na                             | 0.00  | 0.81   | 0.04  | 0.01   | 0.79  | 0.02  | 0.01   | 0.82   | 0.03  | 0.00  | 0.76   | 0.04  | 0.00    | 0.82   | 0.02  | 0.00  | 0.75  | 0.03  |
| K                              | 0.00  | 0.00   | 0.94  | 0.00   | 0.01  | 1.01  | 0.00   | 0.00   | 0.90  | 0.00  | 0.00   | 0.98  | 0.00    | 0.01   | 0.86  | 0.00  | 0.01  | 0.88  |
| Sum                            | 8.00  | 4.99   | 7.80  | 8.00   | 4.99  | 7.86  | 8.00   | 4.99   | 7.78  | 8.00  | 4.99   | 7.84  | 8.00    | 5.00   | 7.77  | 8.00  | 5.00  | 7.72  |

Continued Table S1

| Sample                         | TS077 |       |       | TS078 |       |       | TS082 |       |       | TS0.81 |       |       | TS080  |        |       | TS083  |        |       |
|--------------------------------|-------|-------|-------|-------|-------|-------|-------|-------|-------|--------|-------|-------|--------|--------|-------|--------|--------|-------|
| Mineral                        | Grt   | Pl    | Bt    | Grt   | Pl    | Bt    | Grt   | Pl    | Bt    | Grt    | Pl    | Bt    | Grt    | Pl     | Bt    | Grt    | Pl     | Bt    |
| SiO <sub>2</sub>               | 36.08 | 63.02 | 37.17 | 35.37 | 62.72 | 36.51 | 35.87 | 63.45 | 37.74 | 35.82  | 63.71 | 37.47 | 37.14  | 65.15  | 37.98 | 37.01  | 65.36  | 37.25 |
| TiO <sub>2</sub>               | 0.05  | 0.00  | 2.01  | 0.06  | 0.01  | 1.53  | 0.01  | 0.05  | 2.12  | 0.08   | 0.04  | 1.75  | 0.09   | 0.00   | 1.78  | 0.10   | 0.04   | 1.95  |
| Al <sub>2</sub> O <sub>3</sub> | 21.67 | 22.67 | 18.19 | 21.41 | 22.71 | 16.89 | 21.70 | 22.57 | 16.64 | 21.30  | 22.41 | 16.51 | 21.25  | 22.08  | 16.96 | 20.59  | 21.71  | 16.98 |
| FeO                            | 28.56 | 0.02  | 15.54 | 32.19 | 0.14  | 16.23 | 28.88 | 0.04  | 17.81 | 29.28  | 0.09  | 17.60 | 34.12  | 0.01   | 16.49 | 30.39  | 0.06   | 16.26 |
| Cr <sub>2</sub> O <sub>3</sub> | 0.03  | 0.00  | 0.00  | 0.08  | 0.00  | 0.01  | 0.02  | 0.00  | 0.09  | 0.02   | 0.00  | 0.02  | 0.00   | 0.00   | 0.02  | 0.00   | 0.00   | 0.14  |
| MnO                            | 0.18  | 0.00  | 0.04  | 1.41  | 0.00  | 0.09  | 0.61  | 0.00  | 0.09  | 1.03   | 0.00  | 0.10  | 1.03   | 0.01   | 0.05  | 1.45   | 0.00   | 0.11  |
| MgO                            | 2.10  | 0.00  | 12.65 | 2.83  | 0.00  | 12.90 | 1.45  | 0.01  | 11.79 | 1.41   | 0.00  | 12.27 | 2.38   | 0.00   | 11.61 | 1.83   | 0.01   | 11.63 |
| CaO                            | 11.15 | 4.29  | 0.00  | 6.16  | 4.27  | 0.00  | 11.15 | 3.89  | 0.00  | 10.35  | 3.84  | 0.00  | 4.93   | 3.63   | 0.00  | 8.87   | 3.17   | 0.01  |
| Na <sub>2</sub> O              | 0.04  | 9.27  | 0.22  | 0.02  | 8.94  | 0.15  | 0.00  | 9.34  | 0.19  | 0.02   | 9.49  | 0.19  | 0.05   | 9.54   | 0.47  | 0.02   | 9.69   | 0.41  |
| K <sub>2</sub> O               | 0.00  | 0.06  | 9.92  | 0.00  | 0.09  | 10.18 | 0.00  | 0.08  | 10.15 | 0.00   | 0.05  | 10.07 | 0.00   | 0.07   | 9.40  | 0.00   | 0.15   | 9.11  |
| Total                          | 99.86 | 99.33 | 95.73 | 99.52 | 98.88 | 94.51 | 99.69 | 99.42 | 96.62 | 99.32  | 99.61 | 95.97 | 100.98 | 100.49 | 94.75 | 100.26 | 100.20 | 93.84 |
| O                              | 12    | 8     | 11    | 12    | 8     | 11    | 12    | 8     | 11    | 12     | 8     | 11    | 12     | 8      | 11    | 12     | 8      | 11    |
| Si                             | 2.86  | 2.80  | 2.76  | 2.84  | 2.80  | 2.78  | 2.86  | 2.82  | 2.82  | 2.88   | 2.82  | 2.81  | 2.96   | 2.86   | 2.86  | 2.95   | 2.87   | 2.83  |
| Al                             | 2.02  | 1.19  | 1.59  | 2.02  | 1.20  | 1.51  | 2.04  | 1.18  | 1.46  | 2.02   | 1.17  | 1.46  | 1.99   | 1.14   | 1.50  | 1.94   | 1.12   | 1.52  |
| Cr                             | 0.00  | 0.00  | 0.00  | 0.01  | 0.00  | 0.00  | 0.00  | 0.00  | 0.01  | 0.00   | 0.00  | 0.00  | 0.00   | 0.00   | 0.00  | 0.00   | 0.00   | 0.01  |
| Fe <sup>3+</sup>               | 0.25  | 0.00  | 0.00  | 0.28  | 0.00  | 0.00  | 0.23  | 0.00  | 0.00  | 0.22   | 0.00  | 0.00  | 0.09   | 0.00   | 0.00  | 0.14   | 0.00   | 0.00  |
| Ti                             | 0.00  | 0.00  | 0.11  | 0.00  | 0.00  | 0.09  | 0.00  | 0.00  | 0.12  | 0.01   | 0.00  | 0.10  | 0.01   | 0.00   | 0.10  | 0.01   | 0.00   | 0.11  |
| Mg                             | 0.25  | 0.00  | 1.40  | 0.34  | 0.00  | 1.46  | 0.17  | 0.00  | 1.31  | 0.17   | 0.00  | 1.37  | 0.28   | 0.00   | 1.30  | 0.22   | 0.00   | 1.32  |
| Fe <sup>2+</sup>               | 1.65  | 0.00  | 0.97  | 1.88  | 0.01  | 1.03  | 1.70  | 0.00  | 1.11  | 1.75   | 0.00  | 1.11  | 2.18   | 0.00   | 1.04  | 1.88   | 0.00   | 1.03  |
| Mn                             | 0.01  | 0.00  | 0.00  | 0.10  | 0.00  | 0.01  | 0.04  | 0.00  | 0.01  | 0.07   | 0.00  | 0.01  | 0.07   | 0.00   | 0.00  | 0.10   | 0.00   | 0.01  |
| Ca                             | 0.95  | 0.21  | 0.00  | 0.53  | 0.20  | 0.00  | 0.95  | 0.19  | 0.00  | 0.89   | 0.18  | 0.00  | 0.42   | 0.17   | 0.00  | 0.76   | 0.15   | 0.00  |
| Na                             | 0.01  | 0.80  | 0.03  | 0.00  | 0.77  | 0.02  | 0.00  | 0.80  | 0.03  | 0.00   | 0.82  | 0.03  | 0.01   | 0.81   | 0.07  | 0.00   | 0.83   | 0.06  |
| K                              | 0.00  | 0.00  | 0.94  | 0.00  | 0.01  | 0.99  | 0.00  | 0.00  | 0.97  | 0.00   | 0.00  | 0.97  | 0.00   | 0.00   | 0.90  | 0.00   | 0.01   | 0.88  |
| Sum                            | 8.00  | 5.00  | 7.81  | 8.00  | 4.99  | 7.88  | 8.00  | 5.00  | 7.82  | 8.00   | 5.00  | 7.85  | 8.00   | 4.98   | 7.78  | 8.00   | 4.98   | 7.77  |

Continued Table S1

| Sample                         | TS084 |        |       | TS085 |        |       |        |       |       | ZT003  |       |       | ZT004  |        |       | ZT005  |       |       |
|--------------------------------|-------|--------|-------|-------|--------|-------|--------|-------|-------|--------|-------|-------|--------|--------|-------|--------|-------|-------|
| Mineral                        | Grt   | Pl     | Bt    | Grt-r | Grt-c  | Pl-r  | Pl-c   | Bt-r  | Bt-c  | Grt    | Pl    | Bt    | Grt    | Pl     | Bt    | Grt    | Pl    | Bt    |
| SiO <sub>2</sub>               | 35.29 | 64.74  | 36.88 | 37.03 | 37.05  | 65.01 | 66.06  | 37.38 | 37.90 | 37.41  | 64.59 | 38.46 | 36.78  | 64.51  | 36.65 | 36.39  | 64.47 | 36.95 |
| TiO <sub>2</sub>               | 0.03  | 0.05   | 1.91  | 0.13  | 0.10   | 0.04  | 0.00   | 1.57  | 1.43  | 0.03   | 0.00  | 1.60  | 0.15   | 0.00   | 1.95  | 0.00   | 0.01  | 1.83  |
| Al <sub>2</sub> O <sub>3</sub> | 21.56 | 22.33  | 17.38 | 20.40 | 20.24  | 21.43 | 21.15  | 17.28 | 17.50 | 20.53  | 22.09 | 17.40 | 21.57  | 22.20  | 17.67 | 21.77  | 21.86 | 17.60 |
| FeO                            | 30.27 | 0.07   | 18.03 | 32.81 | 30.37  | 0.02  | 0.07   | 16.81 | 16.52 | 31.28  | 0.03  | 15.97 | 30.05  | 0.00   | 18.29 | 31.45  | 0.02  | 16.14 |
| Cr <sub>2</sub> O <sub>3</sub> | 0.00  | 0.00   | 0.05  | 0.00  | 0.00   | 0.00  | 0.00   | 0.05  | 0.04  | 0.00   | 0.00  | 0.00  | 0.00   | 0.00   | 0.00  | 0.02   | 0.00  | 0.00  |
| MnO                            | 0.50  | 0.00   | 0.11  | 0.83  | 3.34   | 0.02  | 0.00   | 0.09  | 0.09  | 3.32   | 0.01  | 0.04  | 1.57   | 0.03   | 0.09  | 0.53   | 0.00  | 0.06  |
| MgO                            | 1.29  | 0.01   | 10.87 | 1.61  | 0.96   | 0.00  | 0.02   | 11.28 | 11.39 | 2.01   | 0.00  | 12.04 | 1.77   | 0.01   | 11.07 | 2.69   | 0.00  | 12.20 |
| CaO                            | 10.69 | 3.82   | 0.00  | 7.07  | 8.22   | 3.26  | 2.71   | 0.02  | 0.00  | 5.99   | 3.44  | 0.00  | 9.30   | 3.85   | 0.00  | 7.48   | 3.50  | 0.04  |
| Na <sub>2</sub> O              | 0.03  | 9.41   | 0.20  | 0.06  | 0.03   | 9.60  | 9.54   | 0.21  | 0.18  | 0.05   | 9.46  | 0.27  | 0.01   | 9.45   | 0.13  | 0.03   | 9.55  | 0.35  |
| K <sub>2</sub> O               | 0.00  | 0.07   | 9.94  | 0.00  | 0.00   | 0.11  | 0.67   | 9.37  | 9.46  | 0.00   | 0.15  | 9.72  | 0.00   | 0.06   | 9.51  | 0.00   | 0.06  | 8.80  |
| Total                          | 99.65 | 100.50 | 95.36 | 99.93 | 100.32 | 99.49 | 100.21 | 94.04 | 94.50 | 100.61 | 99.78 | 95.50 | 101.19 | 100.10 | 95.35 | 100.36 | 99.46 | 93.96 |
| O                              | 12    | 8      | 11    | 12    | 12     | 8     | 8      | 11    | 11    | 12     | 8     | 11    | 12     | 8      | 11    | 12     | 8     | 11    |
| Si                             | 2.83  | 2.84   | 2.79  | 2.98  | 2.98   | 2.88  | 2.90   | 2.84  | 2.86  | 2.99   | 2.85  | 2.86  | 2.90   | 2.84   | 2.77  | 2.89   | 2.86  | 2.79  |
| Al                             | 2.03  | 1.15   | 1.55  | 1.93  | 1.92   | 1.12  | 1.09   | 1.55  | 1.55  | 1.93   | 1.15  | 1.52  | 2.01   | 1.15   | 1.57  | 2.03   | 1.14  | 1.57  |
| Cr                             | 0.00  | 0.00   | 0.00  | 0.00  | 0.00   | 0.00  | 0.00   | 0.00  | 0.00  | 0.00   | 0.00  | 0.00  | 0.00   | 0.00   | 0.00  | 0.00   | 0.00  | 0.00  |
| Fe <sup>3+</sup>               | 0.31  | 0.00   | 0.00  | 0.09  | 0.11   | 0.00  | 0.00   | 0.00  | 0.00  | 0.08   | 0.00  | 0.00  | 0.17   | 0.00   | 0.00  | 0.19   | 0.00  | 0.00  |
| Ti                             | 0.00  | 0.00   | 0.11  | 0.01  | 0.01   | 0.00  | 0.00   | 0.09  | 0.08  | 0.00   | 0.00  | 0.09  | 0.01   | 0.00   | 0.11  | 0.00   | 0.00  | 0.10  |
| Mg                             | 0.15  | 0.00   | 1.23  | 0.19  | 0.12   | 0.00  | 0.00   | 1.28  | 1.28  | 0.24   | 0.00  | 1.34  | 0.21   | 0.00   | 1.25  | 0.32   | 0.00  | 1.37  |
| Fe <sup>2+</sup>               | 1.72  | 0.00   | 1.14  | 2.12  | 1.93   | 0.00  | 0.00   | 1.07  | 1.04  | 2.01   | 0.00  | 0.99  | 1.82   | 0.00   | 1.16  | 1.89   | 0.00  | 1.02  |
| Mn                             | 0.03  | 0.00   | 0.01  | 0.06  | 0.23   | 0.00  | 0.00   | 0.01  | 0.01  | 0.22   | 0.00  | 0.00  | 0.11   | 0.00   | 0.01  | 0.04   | 0.00  | 0.00  |
| Ca                             | 0.92  | 0.18   | 0.00  | 0.61  | 0.71   | 0.15  | 0.13   | 0.00  | 0.00  | 0.51   | 0.16  | 0.00  | 0.79   | 0.18   | 0.00  | 0.64   | 0.17  | 0.00  |
| Na                             | 0.01  | 0.80   | 0.03  | 0.01  | 0.01   | 0.82  | 0.81   | 0.03  | 0.03  | 0.01   | 0.81  | 0.04  | 0.00   | 0.81   | 0.02  | 0.01   | 0.82  | 0.05  |
| K                              | 0.00  | 0.00   | 0.96  | 0.00  | 0.00   | 0.01  | 0.04   | 0.91  | 0.91  | 0.00   | 0.01  | 0.92  | 0.00   | 0.00   | 0.92  | 0.00   | 0.00  | 0.85  |
| Sum                            | 8.00  | 4.98   | 7.82  | 8.00  | 8.00   | 4.98  | 4.98   | 7.77  | 7.75  | 8.00   | 4.98  | 7.77  | 8.00   | 4.99   | 7.80  | 8.00   | 4.99  | 7.77  |

Continued Table S1

| Sample                         | ZT006  |        |       | ZT007  |       |       | TS079  |        |       | MQ033 |        |       | MQ034  |       |       | TS065-2 |       |       |
|--------------------------------|--------|--------|-------|--------|-------|-------|--------|--------|-------|-------|--------|-------|--------|-------|-------|---------|-------|-------|
| Mineral                        | Grt    | Pl     | Bt    | Grt    | Pl    | Bt    | Grt    | Pl     | Bt    | Grt   | Pl     | Bt    | Grt    | Pl    | Bt    | Grt     | Pl    | Amp   |
| SiO <sub>2</sub>               | 36.33  | 64.60  | 36.94 | 36.97  | 63.72 | 36.22 | 36.96  | 63.63  | 36.61 | 37.28 | 63.69  | 37.45 | 37.56  | 62.95 | 35.29 | 37.43   | 63.87 | 44.60 |
| TiO <sub>2</sub>               | 0.08   | 0.01   | 1.63  | 0.09   | 0.00  | 2.00  | 0.08   | 0.00   | 1.98  | 0.08  | 0.02   | 1.55  | 0.10   | 0.00  | 2.12  | 0.03    | 0.00  | 0.47  |
| Al <sub>2</sub> O <sub>3</sub> | 20.78  | 22.33  | 17.91 | 21.45  | 22.65 | 17.45 | 21.54  | 23.03  | 17.45 | 20.58 | 22.82  | 17.24 | 21.01  | 23.06 | 17.10 | 20.98   | 22.59 | 13.02 |
| FeO                            | 35.44  | 0.01   | 17.37 | 30.53  | 0.02  | 17.44 | 28.38  | 0.04   | 18.71 | 28.55 | 0.03   | 17.22 | 27.47  | 0.04  | 19.20 | 27.17   | 0.10  | 15.99 |
| Cr <sub>2</sub> O <sub>3</sub> | 0.00   | 0.00   | 0.08  | 0.03   | 0.00  | 0.00  | 0.00   | 0.00   | 0.00  | 0.00  | 0.00   | 0.02  | 0.00   | 0.00  | 0.06  | 0.00    | 0.00  | 0.05  |
| MnO                            | 0.78   | 0.00   | 0.05  | 0.74   | 0.00  | 0.03  | 0.35   | 0.00   | 0.10  | 0.20  | 0.00   | 0.10  | 1.24   | 0.02  | 0.11  | 0.64    | 0.00  | 0.24  |
| MgO                            | 2.67   | 0.01   | 11.34 | 2.05   | 0.00  | 11.43 | 1.55   | 0.01   | 10.81 | 1.58  | 0.00   | 11.21 | 1.01   | 0.01  | 9.12  | 3.15    | 0.01  | 9.93  |
| CaO                            | 4.30   | 3.83   | 0.05  | 8.77   | 4.17  | 0.02  | 11.63  | 4.64   | 0.02  | 11.69 | 4.53   | 0.00  | 12.41  | 4.64  | 0.02  | 10.26   | 4.18  | 10.89 |
| Na <sub>2</sub> O              | 0.04   | 9.48   | 0.23  | 0.02   | 9.27  | 0.21  | 0.02   | 9.09   | 0.16  | 0.03  | 8.75   | 0.26  | 0.03   | 8.82  | 0.36  | 0.01    | 9.01  | 1.68  |
| K <sub>2</sub> O               | 0.00   | 0.14   | 9.39  | 0.00   | 0.04  | 9.42  | 0.00   | 0.05   | 9.81  | 0.00  | 0.17   | 10.44 | 0.00   | 0.10  | 10.15 | 0.00    | 0.07  | 0.49  |
| Total                          | 100.41 | 100.39 | 94.99 | 100.65 | 99.87 | 94.22 | 100.51 | 100.49 | 95.64 | 99.97 | 100.01 | 95.48 | 100.82 | 99.63 | 93.51 | 99.68   | 99.83 | 97.37 |
| O                              | 12     | 8      | 11    | 12     | 8     | 11    | 12     | 8      | 11    | 12    | 8      | 11    | 12     | 8     | 11    | 12      | 8     | 23    |
| Si                             | 2.91   | 2.84   | 2.79  | 2.93   | 2.82  | 2.76  | 2.92   | 2.80   | 2.77  | 2.97  | 2.81   | 2.83  | 2.97   | 2.79  | 2.76  | 2.96    | 2.82  | 6.54  |
| Al                             | 1.96   | 1.16   | 1.59  | 2.00   | 1.18  | 1.57  | 2.01   | 1.19   | 1.56  | 1.93  | 1.19   | 1.53  | 1.95   | 1.21  | 1.58  | 1.95    | 1.18  | 2.25  |
| Cr                             | 0.00   | 0.00   | 0.01  | 0.00   | 0.00  | 0.00  | 0.00   | 0.00   | 0.00  | 0.00  | 0.00   | 0.00  | 0.00   | 0.00  | 0.00  | 0.00    | 0.00  | 0.01  |
| Fe <sup>3+</sup>               | 0.21   | 0.00   | 0.00  | 0.12   | 0.00  | 0.00  | 0.14   | 0.00   | 0.00  | 0.13  | 0.00   | 0.00  | 0.10   | 0.00  | 0.00  | 0.12    | 0.00  | 0.58  |
| Ti                             | 0.01   | 0.00   | 0.09  | 0.01   | 0.00  | 0.12  | 0.01   | 0.00   | 0.11  | 0.01  | 0.00   | 0.09  | 0.01   | 0.00  | 0.12  | 0.00    | 0.00  | 0.05  |
| Mg                             | 0.32   | 0.00   | 1.28  | 0.24   | 0.00  | 1.30  | 0.18   | 0.00   | 1.22  | 0.19  | 0.00   | 1.26  | 0.12   | 0.00  | 1.06  | 0.37    | 0.00  | 2.17  |
| Fe <sup>2+</sup>               | 2.17   | 0.00   | 1.10  | 1.90   | 0.00  | 1.11  | 1.74   | 0.00   | 1.18  | 1.77  | 0.00   | 1.09  | 1.72   | 0.00  | 1.26  | 1.68    | 0.00  | 1.38  |
| Mn                             | 0.05   | 0.00   | 0.00  | 0.05   | 0.00  | 0.00  | 0.02   | 0.00   | 0.01  | 0.01  | 0.00   | 0.01  | 0.08   | 0.00  | 0.01  | 0.04    | 0.00  | 0.03  |
| Ca                             | 0.37   | 0.18   | 0.00  | 0.74   | 0.20  | 0.00  | 0.98   | 0.22   | 0.00  | 1.00  | 0.21   | 0.00  | 1.05   | 0.22  | 0.00  | 0.87    | 0.20  | 1.71  |
| Na                             | 0.01   | 0.81   | 0.03  | 0.00   | 0.79  | 0.03  | 0.00   | 0.78   | 0.02  | 0.00  | 0.75   | 0.04  | 0.00   | 0.76  | 0.05  | 0.00    | 0.77  | 0.48  |
| K                              | 0.00   | 0.01   | 0.90  | 0.00   | 0.00  | 0.92  | 0.00   | 0.00   | 0.95  | 0.00  | 0.01   | 1.01  | 0.00   | 0.01  | 1.01  | 0.00    | 0.00  | 0.09  |
| Sum                            | 8.00   | 4.99   | 7.79  | 8.00   | 4.99  | 7.81  | 8.00   | 4.99   | 7.82  | 8.00  | 4.97   | 7.84  | 8.00   | 4.99  | 7.86  | 8.00    | 4.98  | 15.28 |

Continued Table S1

| Sample                         | TS074 |       |       | SS030 | SS031 | SS035 |
|--------------------------------|-------|-------|-------|-------|-------|-------|
| Mineral                        | Grt   | Pl    | Amp   | Ms    | Ms    | Ms    |
| SiO <sub>2</sub>               | 37.76 | 62.58 | 43.04 | 45.31 | 46.95 | 47.09 |
| TiO <sub>2</sub>               | 0.03  | 0.00  | 0.39  | 0.14  | 0.10  | 0.12  |
| Al <sub>2</sub> O <sub>3</sub> | 20.20 | 23.49 | 13.51 | 36.87 | 25.94 | 27.01 |
| FeO                            | 29.76 | 0.05  | 18.89 | 0.51  | 7.47  | 4.76  |
| Cr <sub>2</sub> O <sub>3</sub> | 0.00  | 0.00  | 0.00  | 0.03  | 0.03  | 0.01  |
| MnO                            | 0.74  | 0.01  | 0.19  | 0.00  | 0.22  | 0.03  |
| MgO                            | 2.50  | 0.01  | 7.49  | 0.39  | 2.75  | 2.74  |
| CaO                            | 8.62  | 5.21  | 10.34 | 0.00  | 0.00  | 0.02  |
| Na <sub>2</sub> O              | 0.04  | 8.31  | 2.13  | 1.64  | 0.09  | 0.22  |
| K <sub>2</sub> O               | 0.00  | 0.17  | 0.39  | 8.44  | 11.08 | 10.72 |
| Total                          | 99.65 | 99.83 | 96.36 | 93.33 | 94.63 | 92.70 |
| O                              | 12    | 8     | 23    | 11    | 11    | 11    |
| Si                             | 3.02  | 2.77  | 6.48  | 3.02  | 3.28  | 3.29  |
| Al                             | 1.90  | 1.23  | 2.40  | 2.94  | 2.13  | 2.23  |
| Cr                             | 0.00  | 0.00  | 0.00  | 0.00  | 0.00  | 0.00  |
| Fe <sup>3+</sup>               | 0.06  | 0.00  | 0.53  | 0.00  | 0.00  | 0.00  |
| Ti                             | 0.00  | 0.00  | 0.04  | 0.01  | 0.01  | 0.01  |
| Mg                             | 0.30  | 0.00  | 1.68  | 0.03  | 0.29  | 0.29  |
| Fe <sup>2+</sup>               | 1.93  | 0.00  | 1.85  | 0.02  | 0.44  | 0.28  |
| Mn                             | 0.05  | 0.00  | 0.02  | 0.00  | 0.01  | 0.00  |
| Ca                             | 0.74  | 0.25  | 1.67  | 0.00  | 0.00  | 0.00  |
| Na                             | 0.01  | 0.71  | 0.62  | 0.24  | 0.01  | 0.03  |
| K                              | 0.00  | 0.01  | 0.08  | 0.68  | 0.99  | 0.96  |
| Sum                            | 8.00  | 4.97  | 15.36 | 6.96  | 7.15  | 7.08  |
