# Supplementary material
Source: MDPI journal article supplement (https://www.mdpi.com/2075-163X/12/10/1201)
Supplement: s1 [file s1]

**Table S3.** The peak metamorphic PT-conditions for the various units across the Dabie orogen.

| Units          | T   | T <sub>s</sub> | P    | P <sub>s</sub> | Reference          |
|----------------|-----|----------------|------|----------------|--------------------|
| Foziling Group | 570 | 31             | 0.71 | 0.14           | Wang [32]          |
| NDMB           | 857 | 66             | 4.50 | 0.71           | Liu [73], Shi [74] |
| CDMB-I         | 728 | 58             | 3.87 | 0.36           | Shi [45]           |
| CDMB-II        | 613 | 48             | 3.09 | 0.20           | Shi [45]           |
| SDMB           | 521 | 50             | 2.40 | 0.24           | Shi [45]           |
| SSCR           | 531 | 35             | 0.98 | 0.07           | this study         |

Note: CDMB includes two sub-unit I and II on the basis of Shi [45].
