# Supplementary material
Source: MDPI journal article supplement (https://www.mdpi.com/2075-163X/12/10/1201)
Supplement: s1 [file s1]

**Table S2.** The detrital zircon U-Pb ages for three garnet mica schists from the SSCR.

| Spot      | Content (ppm) |        |      | Isotopic ratios |            |            |            |            |            | Apparent ages (Ma) |            |            |            |            |            |
|-----------|---------------|--------|------|-----------------|------------|------------|------------|------------|------------|--------------------|------------|------------|------------|------------|------------|
|           | Th            | U      | Th/U | 207Pb/206Pb     | 1 $\sigma$ | 207Pb/235U | 1 $\sigma$ | 206Pb/238U | 1 $\sigma$ | 207Pb/206Pb        | 1 $\sigma$ | 207Pb/235U | 1 $\sigma$ | 206Pb/238U | 1 $\sigma$ |
| ZT003     |               |        |      |                 |            |            |            |            |            |                    |            |            |            |            |            |
| Group-I   |               |        |      |                 |            |            |            |            |            |                    |            |            |            |            |            |
| 1         | 36.50         | 173.19 | 0.21 | 0.2315          | 0.0092     | 16.8713    | 0.5761     | 0.5286     | 0.0109     | 3062               | 65         | 2928       | 33         | 2735       | 46         |
| 2         | 8.91          | 17.14  | 0.52 | 0.2208          | 0.0087     | 17.4435    | 0.7698     | 0.5729     | 0.0143     | 2987               | 64         | 2960       | 42         | 2920       | 59         |
| 3         | 93.03         | 173.22 | 0.54 | 0.2115          | 0.0059     | 16.2137    | 0.5706     | 0.5560     | 0.0120     | 2917               | 47         | 2889       | 34         | 2850       | 50         |
| 4         | 105.76        | 226.89 | 0.47 | 0.2100          | 0.0059     | 15.2628    | 0.5367     | 0.5271     | 0.0112     | 2906               | 47         | 2832       | 34         | 2729       | 47         |
| 5         | 30.69         | 45.73  | 0.67 | 0.2099          | 0.0069     | 16.3095    | 0.6222     | 0.5636     | 0.0123     | 2905               | 54         | 2895       | 37         | 2882       | 51         |
| 6         | 103.48        | 215.42 | 0.48 | 0.2046          | 0.0057     | 13.7123    | 0.4801     | 0.4861     | 0.0103     | 2863               | 48         | 2730       | 33         | 2554       | 45         |
| 7         | 40.74         | 218.12 | 0.19 | 0.2039          | 0.0057     | 13.4414    | 0.4652     | 0.4782     | 0.0098     | 2857               | 47         | 2711       | 33         | 2519       | 43         |
| 8         | 52.22         | 378.09 | 0.14 | 0.2025          | 0.0056     | 12.5556    | 0.4304     | 0.4498     | 0.0093     | 2846               | 48         | 2647       | 32         | 2394       | 41         |
| 9         | 134.34        | 164.86 | 0.81 | 0.2023          | 0.0057     | 15.7752    | 0.5483     | 0.5655     | 0.0119     | 2845               | 44         | 2863       | 33         | 2889       | 49         |
| 10        | 55.09         | 111.60 | 0.49 | 0.1853          | 0.0054     | 12.3935    | 0.4471     | 0.4850     | 0.0103     | 2701               | 51         | 2635       | 34         | 2549       | 45         |
| 11        | 12.51         | 21.05  | 0.59 | 0.1835          | 0.0066     | 12.4539    | 0.5240     | 0.4923     | 0.0115     | 2684               | 58         | 2639       | 40         | 2581       | 50         |
| Group-II  |               |        |      |                 |            |            |            |            |            |                    |            |            |            |            |            |
| 12        | 128.53        | 190.40 | 0.68 | 0.1638          | 0.0046     | 10.1030    | 0.3515     | 0.4475     | 0.0092     | 2495               | 49         | 2444       | 32         | 2384       | 41         |
| 13        | 107.72        | 231.98 | 0.46 | 0.1627          | 0.0045     | 9.7899     | 0.3405     | 0.4365     | 0.0091     | 2484               | 49         | 2415       | 32         | 2335       | 41         |
| 14        | 203.89        | 262.31 | 0.78 | 0.1624          | 0.0046     | 8.4609     | 0.2949     | 0.3778     | 0.0078     | 2481               | 46         | 2282       | 32         | 2066       | 37         |
| 15        | 158.36        | 279.22 | 0.57 | 0.1623          | 0.0046     | 9.7923     | 0.3383     | 0.4376     | 0.0090     | 2480               | 44         | 2415       | 32         | 2340       | 40         |
| 16        | 136.12        | 348.61 | 0.39 | 0.1620          | 0.0045     | 9.5380     | 0.3287     | 0.4269     | 0.0088     | 2477               | 48         | 2391       | 32         | 2292       | 40         |
| 17        | 142.32        | 339.66 | 0.42 | 0.1612          | 0.0045     | 8.4670     | 0.2921     | 0.3811     | 0.0079     | 2468               | 46         | 2282       | 31         | 2081       | 37         |
| 18        | 110.39        | 98.38  | 1.12 | 0.1608          | 0.0047     | 10.3832    | 0.3723     | 0.4684     | 0.0098     | 2464               | 52         | 2470       | 33         | 2476       | 43         |
| 19        | 208.00        | 349.97 | 0.59 | 0.1607          | 0.0076     | 8.7127     | 0.3600     | 0.3933     | 0.0089     | 2463               | 82         | 2308       | 38         | 2138       | 41         |
| 20        | 66.93         | 99.48  | 0.67 | 0.1602          | 0.0050     | 9.8469     | 0.3730     | 0.4459     | 0.0096     | 2457               | 56         | 2421       | 35         | 2377       | 43         |
| 21        | 95.07         | 140.70 | 0.68 | 0.1580          | 0.0046     | 8.5641     | 0.3085     | 0.3931     | 0.0085     | 2434               | 51         | 2293       | 33         | 2137       | 39         |
| 22        | 49.08         | 282.44 | 0.17 | 0.1578          | 0.0044     | 9.4219     | 0.3255     | 0.4331     | 0.0089     | 2432               | 49         | 2380       | 32         | 2320       | 40         |
| 23        | 104.81        | 229.78 | 0.46 | 0.1570          | 0.0046     | 8.3552     | 0.3078     | 0.3860     | 0.0086     | 2423               | 52         | 2270       | 33         | 2104       | 40         |
| 24        | 178.52        | 345.07 | 0.52 | 0.1542          | 0.0043     | 8.6474     | 0.2994     | 0.4066     | 0.0084     | 2393               | 49         | 2302       | 32         | 2199       | 39         |
| 12        | 128.53        | 190.40 | 0.68 | 0.1638          | 0.0046     | 10.1030    | 0.3515     | 0.4475     | 0.0092     | 2495               | 49         | 2444       | 32         | 2384       | 41         |
| 13        | 107.72        | 231.98 | 0.46 | 0.1627          | 0.0045     | 9.7899     | 0.3405     | 0.4365     | 0.0091     | 2484               | 49         | 2415       | 32         | 2335       | 41         |
| 14        | 203.89        | 262.31 | 0.78 | 0.1624          | 0.0046     | 8.4609     | 0.2949     | 0.3778     | 0.0078     | 2481               | 46         | 2282       | 32         | 2066       | 37         |
| 15        | 158.36        | 279.22 | 0.57 | 0.1623          | 0.0046     | 9.7923     | 0.3383     | 0.4376     | 0.0090     | 2480               | 44         | 2415       | 32         | 2340       | 40         |
| 16        | 136.12        | 348.61 | 0.39 | 0.1620          | 0.0045     | 9.5380     | 0.3287     | 0.4269     | 0.0088     | 2477               | 48         | 2391       | 32         | 2292       | 40         |
| 17        | 142.32        | 339.66 | 0.42 | 0.1612          | 0.0045     | 8.4670     | 0.2921     | 0.3811     | 0.0079     | 2468               | 46         | 2282       | 31         | 2081       | 37         |
| 18        | 110.39        | 98.38  | 1.12 | 0.1608          | 0.0047     | 10.3832    | 0.3723     | 0.4684     | 0.0098     | 2464               | 52         | 2470       | 33         | 2476       | 43         |
| 19        | 208.00        | 349.97 | 0.59 | 0.1607          | 0.0076     | 8.7127     | 0.3600     | 0.3933     | 0.0089     | 2463               | 82         | 2308       | 38         | 2138       | 41         |
| 20        | 66.93         | 99.48  | 0.67 | 0.1602          | 0.0050     | 9.8469     | 0.3730     | 0.4459     | 0.0096     | 2457               | 56         | 2421       | 35         | 2377       | 43         |
| 21        | 95.07         | 140.70 | 0.68 | 0.1580          | 0.0046     | 8.5641     | 0.3085     | 0.3931     | 0.0085     | 2434               | 51         | 2293       | 33         | 2137       | 39         |
| 22        | 49.08         | 282.44 | 0.17 | 0.1578          | 0.0044     | 9.4219     | 0.3255     | 0.4331     | 0.0089     | 2432               | 49         | 2380       | 32         | 2320       | 40         |
| 23        | 104.81        | 229.78 | 0.46 | 0.1570          | 0.0046     | 8.3552     | 0.3078     | 0.3860     | 0.0086     | 2423               | 52         | 2270       | 33         | 2104       | 40         |
| 24        | 178.52        | 345.07 | 0.52 | 0.1542          | 0.0043     | 8.6474     | 0.2994     | 0.4066     | 0.0084     | 2393               | 49         | 2302       | 32         | 2199       | 39         |
| Group-III |               |        |      |                 |            |            |            |            |            |                    |            |            |            |            |            |
| 25        | 90.29         | 93.59  | 0.96 | 0.1310          | 0.0041     | 6.3791     | 0.2420     | 0.3532     | 0.0075     | 2111               | 59         | 2029       | 33         | 1950       | 36         |

|          |        |        |      |        |        |        |        |        |        |      |     |      |    |      |    |
|----------|--------|--------|------|--------|--------|--------|--------|--------|--------|------|-----|------|----|------|----|
| 26       | 103.87 | 85.08  | 1.22 | 0.1289 | 0.0043 | 7.3883 | 0.2863 | 0.4156 | 0.0091 | 2083 | 56  | 2160 | 35 | 2240 | 41 |
| 27       | 72.66  | 52.96  | 1.37 | 0.1278 | 0.0043 | 6.4063 | 0.2559 | 0.3637 | 0.0080 | 2067 | 62  | 2033 | 35 | 2000 | 38 |
| 28       | 93.57  | 85.38  | 1.10 | 0.1275 | 0.0042 | 6.6931 | 0.2590 | 0.3807 | 0.0083 | 2064 | 58  | 2072 | 34 | 2079 | 39 |
| 29       | 182.85 | 163.87 | 1.12 | 0.1267 | 0.0037 | 5.9485 | 0.2134 | 0.3406 | 0.0072 | 2052 | 53  | 1968 | 31 | 1890 | 34 |
| 30       | 123.19 | 156.62 | 0.79 | 0.1266 | 0.0038 | 5.9016 | 0.2182 | 0.3382 | 0.0073 | 2051 | 56  | 1961 | 32 | 1878 | 35 |
| 31       | 125.00 | 73.62  | 1.70 | 0.1259 | 0.0041 | 6.3831 | 0.2471 | 0.3676 | 0.0079 | 2042 | 60  | 2030 | 34 | 2018 | 37 |
| 32       | 48.89  | 61.94  | 0.79 | 0.1249 | 0.0040 | 6.1698 | 0.2361 | 0.3583 | 0.0076 | 2027 | 59  | 2000 | 33 | 1974 | 36 |
| 33       | 233.31 | 255.28 | 0.91 | 0.1245 | 0.0035 | 5.9628 | 0.2084 | 0.3474 | 0.0072 | 2021 | 52  | 1970 | 30 | 1922 | 34 |
| 34       | 262.96 | 509.60 | 0.52 | 0.1244 | 0.0034 | 5.4281 | 0.1870 | 0.3165 | 0.0065 | 2020 | 51  | 1889 | 30 | 1773 | 32 |
| 35       | 163.42 | 234.34 | 0.70 | 0.1243 | 0.0035 | 5.8813 | 0.2052 | 0.3432 | 0.0071 | 2019 | 52  | 1958 | 30 | 1902 | 34 |
| 36       | 209.80 | 380.46 | 0.55 | 0.1242 | 0.0037 | 5.1764 | 0.1862 | 0.3024 | 0.0065 | 2017 | 48  | 1849 | 31 | 1703 | 32 |
| 37       | 116.54 | 116.89 | 1.00 | 0.1239 | 0.0038 | 5.9454 | 0.2203 | 0.3479 | 0.0074 | 2014 | 56  | 1968 | 32 | 1925 | 35 |
| 38       | 500.22 | 305.69 | 1.64 | 0.1239 | 0.0035 | 5.4322 | 0.1924 | 0.3179 | 0.0067 | 2014 | 53  | 1890 | 30 | 1779 | 33 |
| 39       | 111.92 | 62.60  | 1.79 | 0.1238 | 0.0041 | 6.0457 | 0.2386 | 0.3542 | 0.0078 | 2012 | 62  | 1982 | 34 | 1955 | 37 |
| 40       | 136.76 | 223.20 | 0.61 | 0.1226 | 0.0035 | 6.3233 | 0.2219 | 0.3740 | 0.0078 | 1995 | 52  | 2022 | 31 | 2048 | 37 |
| 41       | 209.17 | 209.72 | 1.00 | 0.1227 | 0.0036 | 5.7522 | 0.2070 | 0.3401 | 0.0072 | 1995 | 54  | 1939 | 31 | 1887 | 35 |
| 42       | 109.15 | 415.93 | 0.26 | 0.1224 | 0.0035 | 5.0515 | 0.1780 | 0.2993 | 0.0062 | 1992 | 53  | 1828 | 30 | 1688 | 31 |
| 43       | 134.06 | 189.85 | 0.71 | 0.1218 | 0.0035 | 6.2658 | 0.2222 | 0.3732 | 0.0077 | 1982 | 53  | 2014 | 31 | 2045 | 36 |
| 44       | 78.34  | 132.87 | 0.59 | 0.1205 | 0.0037 | 4.9980 | 0.1888 | 0.3008 | 0.0065 | 1964 | 58  | 1819 | 32 | 1695 | 32 |
| 45       | 102.62 | 184.85 | 0.56 | 0.1151 | 0.0058 | 4.3160 | 0.1965 | 0.2719 | 0.0060 | 1882 | 93  | 1696 | 38 | 1551 | 30 |
| 46       | 106.37 | 146.23 | 0.73 | 0.1117 | 0.0065 | 4.6305 | 0.2466 | 0.3007 | 0.0071 | 1827 | 108 | 1755 | 44 | 1695 | 35 |
| Group-IV |        |        |      |        |        |        |        |        |        |      |     |      |    |      |    |
| 47       | 40.86  | 69.67  | 0.59 | 0.0932 | 0.0035 | 2.9783 | 0.1274 | 0.2317 | 0.0051 | 1492 | 69  | 1402 | 33 | 1343 | 27 |
| 48       | 121.82 | 144.75 | 0.84 | 0.0916 | 0.0032 | 2.8492 | 0.1129 | 0.2255 | 0.0048 | 1460 | 57  | 1369 | 30 | 1311 | 25 |
| 49       | 41.45  | 47.84  | 0.87 | 0.0912 | 0.0041 | 3.0526 | 0.1537 | 0.2428 | 0.0056 | 1450 | 92  | 1421 | 39 | 1401 | 29 |
| 50       | 16.52  | 26.01  | 0.64 | 0.0908 | 0.0047 | 2.8789 | 0.1635 | 0.2300 | 0.0055 | 1442 | 105 | 1376 | 43 | 1335 | 29 |
| 51       | 293.31 | 299.62 | 0.98 | 0.0904 | 0.0027 | 2.7760 | 0.1004 | 0.2227 | 0.0046 | 1434 | 56  | 1349 | 27 | 1296 | 24 |
| 52       | 33.97  | 32.78  | 1.04 | 0.0903 | 0.0078 | 2.8660 | 0.3065 | 0.2302 | 0.0070 | 1432 | 163 | 1373 | 80 | 1335 | 37 |
| 53       | 104.81 | 98.36  | 1.07 | 0.0890 | 0.0030 | 2.8288 | 0.1125 | 0.2306 | 0.0049 | 1404 | 68  | 1363 | 30 | 1338 | 26 |
| 54       | 127.84 | 348.53 | 0.37 | 0.0886 | 0.0026 | 2.8227 | 0.1012 | 0.2312 | 0.0048 | 1394 | 59  | 1362 | 27 | 1341 | 25 |
| 55       | 335.04 | 167.81 | 2.00 | 0.0885 | 0.0029 | 2.7844 | 0.1075 | 0.2282 | 0.0048 | 1393 | 64  | 1351 | 29 | 1325 | 25 |
| 56       | 86.36  | 149.58 | 0.58 | 0.0880 | 0.0028 | 2.9431 | 0.1111 | 0.2426 | 0.0051 | 1382 | 63  | 1393 | 29 | 1400 | 26 |
| 57       | 132.88 | 167.91 | 0.79 | 0.0879 | 0.0030 | 2.7441 | 0.1098 | 0.2265 | 0.0049 | 1380 | 68  | 1340 | 30 | 1316 | 26 |
| 58       | 118.56 | 170.71 | 0.69 | 0.0877 | 0.0028 | 2.8276 | 0.1067 | 0.2337 | 0.0049 | 1377 | 63  | 1363 | 28 | 1354 | 26 |
| 59       | 98.63  | 115.93 | 0.85 | 0.0876 | 0.0030 | 2.8811 | 0.1167 | 0.2384 | 0.0052 | 1375 | 69  | 1377 | 31 | 1379 | 27 |
| 60       | 329.16 | 343.05 | 0.96 | 0.0870 | 0.0026 | 2.6783 | 0.0958 | 0.2233 | 0.0046 | 1360 | 59  | 1322 | 26 | 1299 | 24 |
| 61       | 50.05  | 43.43  | 1.15 | 0.0868 | 0.0036 | 2.7059 | 0.1279 | 0.2261 | 0.0051 | 1356 | 84  | 1330 | 35 | 1314 | 27 |
| 62       | 133.02 | 441.16 | 0.30 | 0.0860 | 0.0025 | 2.5273 | 0.0909 | 0.2132 | 0.0044 | 1338 | 59  | 1280 | 26 | 1246 | 24 |
| 63       | 468.41 | 382.77 | 1.22 | 0.0860 | 0.0026 | 2.1409 | 0.0787 | 0.1807 | 0.0038 | 1337 | 59  | 1162 | 25 | 1071 | 21 |
| 64       | 46.11  | 57.14  | 0.81 | 0.0857 | 0.0039 | 2.5727 | 0.1264 | 0.2177 | 0.0050 | 1331 | 82  | 1293 | 36 | 1270 | 26 |
| 65       | 59.34  | 80.82  | 0.73 | 0.0853 | 0.0031 | 2.8361 | 0.1212 | 0.2411 | 0.0053 | 1322 | 76  | 1365 | 32 | 1393 | 28 |
| 66       | 92.10  | 126.92 | 0.73 | 0.0818 | 0.0055 | 2.4397 | 0.1987 | 0.2163 | 0.0054 | 1241 | 138 | 1254 | 59 | 1262 | 29 |
| 67       | 14.17  | 28.22  | 0.50 | 0.0814 | 0.0049 | 2.6092 | 0.1638 | 0.2325 | 0.0060 | 1231 | 113 | 1303 | 46 | 1347 | 31 |
| Group-V  |        |        |      |        |        |        |        |        |        |      |     |      |    |      |    |
| 68       | 52.62  | 73.40  | 0.72 | 0.0729 | 0.0036 | 1.3636 | 0.0716 | 0.1356 | 0.0032 | 1012 | 89  | 873  | 31 | 820  | 18 |

|           |        |        |      |        |        |         |        |        |        |      |     |      |    |      |    |
|-----------|--------|--------|------|--------|--------|---------|--------|--------|--------|------|-----|------|----|------|----|
| 69        | 127.13 | 190.41 | 0.67 | 0.0716 | 0.0028 | 1.2790  | 0.0568 | 0.1296 | 0.0028 | 974  | 83  | 836  | 25 | 786  | 16 |
| 70        | 132.55 | 138.96 | 0.95 | 0.0652 | 0.0027 | 1.1516  | 0.0540 | 0.1280 | 0.0028 | 782  | 91  | 778  | 25 | 777  | 16 |
| 71        | 250.15 | 205.47 | 1.22 | 0.0717 | 0.0027 | 1.2053  | 0.0521 | 0.1219 | 0.0026 | 978  | 81  | 803  | 24 | 742  | 15 |
| ZT005     |        |        |      |        |        |         |        |        |        |      |     |      |    |      |    |
| Group-I   |        |        |      |        |        |         |        |        |        |      |     |      |    |      |    |
| 1         | 35.71  | 76.40  | 0.47 | 0.2187 | 0.0090 | 16.6990 | 0.7329 | 0.5537 | 0.0135 | 2971 | 65  | 2918 | 42 | 2840 | 56 |
| 2         | 25.07  | 54.61  | 0.46 | 0.2137 | 0.0092 | 17.1427 | 0.7863 | 0.5819 | 0.0146 | 2933 | 70  | 2943 | 44 | 2957 | 60 |
| Group-II  |        |        |      |        |        |         |        |        |        |      |     |      |    |      |    |
| 3         | 22.08  | 202.07 | 0.11 | 0.1856 | 0.0080 | 11.5927 | 0.5302 | 0.4530 | 0.0115 | 2703 | 61  | 2572 | 43 | 2409 | 51 |
| 3         | 22.08  | 202.07 | 0.11 | 0.1856 | 0.0080 | 11.5927 | 0.5302 | 0.4530 | 0.0115 | 2703 | 61  | 2572 | 43 | 2409 | 51 |
| 4         | 42.43  | 86.00  | 0.49 | 0.1781 | 0.0051 | 11.8310 | 0.3819 | 0.4819 | 0.0106 | 2635 | 45  | 2591 | 30 | 2535 | 46 |
| 5         | 165.03 | 263.61 | 0.63 | 0.1747 | 0.0071 | 11.2429 | 0.4867 | 0.4667 | 0.0113 | 2603 | 62  | 2543 | 40 | 2469 | 50 |
| 6         | 21.91  | 81.07  | 0.27 | 0.1733 | 0.0074 | 11.1382 | 0.5011 | 0.4662 | 0.0115 | 2590 | 73  | 2535 | 42 | 2467 | 51 |
| 7         | 59.60  | 162.02 | 0.37 | 0.1650 | 0.0043 | 9.8014  | 0.3726 | 0.4308 | 0.0106 | 2508 | 42  | 2416 | 35 | 2309 | 48 |
| 8         | 79.22  | 98.80  | 0.80 | 0.1635 | 0.0069 | 9.6974  | 0.4384 | 0.4303 | 0.0106 | 2492 | 73  | 2406 | 42 | 2307 | 48 |
| 9         | 149.14 | 221.24 | 0.67 | 0.1632 | 0.0067 | 9.9603  | 0.4351 | 0.4427 | 0.0107 | 2489 | 67  | 2431 | 40 | 2363 | 48 |
| 10        | 170.36 | 234.32 | 0.73 | 0.1625 | 0.0066 | 9.0799  | 0.3969 | 0.4053 | 0.0099 | 2482 | 72  | 2346 | 40 | 2193 | 45 |
| 11        | 46.57  | 108.81 | 0.43 | 0.1624 | 0.0069 | 9.7912  | 0.4434 | 0.4373 | 0.0108 | 2481 | 62  | 2415 | 42 | 2339 | 48 |
| 12        | 431.45 | 280.02 | 1.54 | 0.1623 | 0.0065 | 10.0267 | 0.4329 | 0.4482 | 0.0108 | 2479 | 70  | 2437 | 40 | 2387 | 48 |
| 13        | 31.43  | 71.48  | 0.44 | 0.1619 | 0.0070 | 9.9954  | 0.4612 | 0.4479 | 0.0112 | 2475 | 70  | 2434 | 43 | 2386 | 50 |
| 14        | 164.90 | 272.17 | 0.61 | 0.1612 | 0.0045 | 9.7020  | 0.2999 | 0.4365 | 0.0093 | 2468 | 44  | 2407 | 28 | 2335 | 42 |
| 15        | 122.39 | 102.87 | 1.19 | 0.1610 | 0.0068 | 9.3199  | 0.4212 | 0.4199 | 0.0103 | 2466 | 71  | 2370 | 41 | 2260 | 47 |
| 16        | 84.84  | 113.25 | 0.75 | 0.1604 | 0.0068 | 9.9584  | 0.4474 | 0.4504 | 0.0112 | 2459 | 73  | 2431 | 41 | 2397 | 50 |
| 17        | 82.56  | 116.16 | 0.71 | 0.1596 | 0.0048 | 9.0116  | 0.3092 | 0.4096 | 0.0097 | 2451 | 48  | 2339 | 31 | 2213 | 44 |
| 18        | 70.01  | 160.59 | 0.44 | 0.1587 | 0.0065 | 9.4672  | 0.4163 | 0.4326 | 0.0106 | 2442 | 69  | 2384 | 40 | 2317 | 47 |
| 19        | 64.63  | 178.76 | 0.36 | 0.1575 | 0.0065 | 9.7845  | 0.4333 | 0.4504 | 0.0110 | 2429 | 67  | 2415 | 41 | 2397 | 49 |
| 20        | 153.01 | 372.40 | 0.41 | 0.1568 | 0.0063 | 9.0790  | 0.3933 | 0.4201 | 0.0102 | 2421 | 65  | 2346 | 40 | 2261 | 46 |
| 21        | 57.74  | 267.01 | 0.22 | 0.1496 | 0.0061 | 8.2493  | 0.3587 | 0.4001 | 0.0097 | 2341 | 70  | 2259 | 39 | 2169 | 45 |
| Group-III |        |        |      |        |        |         |        |        |        |      |     |      |    |      |    |
| 22        | 17.27  | 24.09  | 0.72 | 0.1318 | 0.0090 | 6.5591  | 0.5259 | 0.3609 | 0.0111 | 2122 | 114 | 2054 | 71 | 1986 | 53 |
| 23        | 20.50  | 215.37 | 0.10 | 0.1278 | 0.0055 | 6.2171  | 0.2842 | 0.3529 | 0.0088 | 2068 | 73  | 2007 | 40 | 1948 | 42 |
| 24        | 160.79 | 217.83 | 0.74 | 0.1276 | 0.0053 | 6.3654  | 0.2821 | 0.3617 | 0.0088 | 2066 | 69  | 2028 | 39 | 1990 | 42 |
| 25        | 64.04  | 58.39  | 1.10 | 0.1276 | 0.0058 | 6.2726  | 0.3004 | 0.3565 | 0.0090 | 2065 | 78  | 2015 | 42 | 1966 | 43 |
| 26        | 115.96 | 216.43 | 0.54 | 0.1267 | 0.0053 | 5.9429  | 0.2648 | 0.3402 | 0.0083 | 2053 | 75  | 1968 | 39 | 1888 | 40 |
| 27        | 103.39 | 120.37 | 0.86 | 0.1265 | 0.0054 | 6.0783  | 0.2754 | 0.3485 | 0.0086 | 2050 | 78  | 1987 | 40 | 1927 | 41 |
| 28        | 43.92  | 54.37  | 0.81 | 0.1261 | 0.0058 | 6.1809  | 0.2991 | 0.3555 | 0.0090 | 2044 | 76  | 2002 | 42 | 1961 | 43 |
| 29        | 95.27  | 167.18 | 0.57 | 0.1255 | 0.0037 | 5.8347  | 0.1938 | 0.3372 | 0.0078 | 2036 | 50  | 1952 | 29 | 1873 | 37 |
| 30        | 152.61 | 124.32 | 1.23 | 0.1253 | 0.0054 | 6.1276  | 0.2817 | 0.3547 | 0.0088 | 2033 | 73  | 1994 | 40 | 1957 | 42 |
| 31        | 188.07 | 248.65 | 0.76 | 0.1250 | 0.0051 | 6.0360  | 0.2640 | 0.3503 | 0.0085 | 2029 | 73  | 1981 | 38 | 1936 | 40 |
| 32        | 76.86  | 57.31  | 1.34 | 0.1247 | 0.0058 | 6.0604  | 0.2945 | 0.3526 | 0.0089 | 2024 | 83  | 1985 | 42 | 1947 | 42 |
| 33        | 36.53  | 35.25  | 1.04 | 0.1245 | 0.0063 | 6.1631  | 0.3226 | 0.3590 | 0.0093 | 2022 | 87  | 1999 | 46 | 1977 | 44 |
| 34        | 119.98 | 142.88 | 0.84 | 0.1242 | 0.0053 | 5.9924  | 0.2702 | 0.3499 | 0.0086 | 2018 | 69  | 1975 | 39 | 1934 | 41 |
| 35        | 115.19 | 92.26  | 1.25 | 0.1241 | 0.0054 | 6.3174  | 0.2922 | 0.3693 | 0.0092 | 2015 | 73  | 2021 | 41 | 2026 | 43 |
| 36        | 398.72 | 388.03 | 1.03 | 0.1239 | 0.0033 | 5.8502  | 0.1762 | 0.3425 | 0.0072 | 2013 | 45  | 1954 | 26 | 1899 | 35 |

|          |        |        |      |        |        |        |        |        |        |      |     |      |    |      |    |
|----------|--------|--------|------|--------|--------|--------|--------|--------|--------|------|-----|------|----|------|----|
| 37       | 138.04 | 112.91 | 1.22 | 0.1237 | 0.0054 | 6.1479 | 0.2839 | 0.3604 | 0.0089 | 2011 | 73  | 1997 | 40 | 1984 | 42 |
| 38       | 170.24 | 149.68 | 1.14 | 0.1238 | 0.0052 | 5.9998 | 0.2660 | 0.3516 | 0.0085 | 2011 | 71  | 1976 | 39 | 1942 | 41 |
| 39       | 57.89  | 76.66  | 0.76 | 0.1233 | 0.0054 | 6.0500 | 0.2826 | 0.3559 | 0.0089 | 2005 | 75  | 1983 | 41 | 1963 | 42 |
| 40       | 144.95 | 163.22 | 0.89 | 0.1231 | 0.0051 | 6.0547 | 0.2699 | 0.3567 | 0.0087 | 2002 | 71  | 1984 | 39 | 1967 | 41 |
| 41       | 74.92  | 161.68 | 0.46 | 0.1231 | 0.0051 | 6.1912 | 0.2770 | 0.3649 | 0.0090 | 2001 | 78  | 2003 | 39 | 2005 | 43 |
| 42       | 133.65 | 110.80 | 1.21 | 0.1230 | 0.0053 | 5.8057 | 0.2659 | 0.3424 | 0.0085 | 2000 | 77  | 1947 | 40 | 1898 | 41 |
| 43       | 281.12 | 359.41 | 0.78 | 0.1230 | 0.0050 | 5.6297 | 0.2459 | 0.3321 | 0.0080 | 2000 | 70  | 1921 | 38 | 1848 | 39 |
| 44       | 85.10  | 103.47 | 0.82 | 0.1217 | 0.0053 | 5.9864 | 0.2759 | 0.3567 | 0.0089 | 1982 | 75  | 1974 | 40 | 1966 | 42 |
| 45       | 125.05 | 79.35  | 1.58 | 0.1215 | 0.0038 | 5.7587 | 0.1993 | 0.3436 | 0.0078 | 1979 | 52  | 1940 | 30 | 1904 | 37 |
| 46       | 74.52  | 83.55  | 0.89 | 0.1213 | 0.0055 | 5.9078 | 0.2799 | 0.3532 | 0.0088 | 1976 | 81  | 1962 | 41 | 1950 | 42 |
| 47       | 69.67  | 72.87  | 0.96 | 0.1202 | 0.0056 | 5.4338 | 0.2672 | 0.3279 | 0.0085 | 1959 | 80  | 1890 | 42 | 1828 | 41 |
| 48       | 87.27  | 67.68  | 1.29 | 0.1200 | 0.0059 | 5.6634 | 0.2887 | 0.3424 | 0.0090 | 1956 | 88  | 1926 | 44 | 1898 | 43 |
| Group-IV |        |        |      |        |        |        |        |        |        |      |     |      |    |      |    |
| 49       | 49.04  | 78.46  | 0.63 | 0.0899 | 0.0047 | 2.9689 | 0.1585 | 0.2394 | 0.0061 | 1424 | 96  | 1400 | 41 | 1384 | 32 |
| 50       | 50.05  | 107.50 | 0.47 | 0.0898 | 0.0045 | 2.8992 | 0.1498 | 0.2342 | 0.0060 | 1421 | 99  | 1382 | 39 | 1357 | 31 |
| 51       | 40.20  | 85.03  | 0.47 | 0.0892 | 0.0041 | 2.8767 | 0.1389 | 0.2339 | 0.0058 | 1409 | 87  | 1376 | 36 | 1355 | 30 |
| 52       | 73.85  | 114.50 | 0.64 | 0.0888 | 0.0042 | 2.9038 | 0.1413 | 0.2372 | 0.0059 | 1399 | 91  | 1383 | 37 | 1372 | 31 |
| 53       | 96.46  | 122.21 | 0.79 | 0.0884 | 0.0040 | 2.8243 | 0.1363 | 0.2318 | 0.0057 | 1391 | 86  | 1362 | 36 | 1344 | 30 |
| 54       | 48.04  | 112.61 | 0.43 | 0.0879 | 0.0043 | 2.8661 | 0.1469 | 0.2365 | 0.0060 | 1380 | 91  | 1373 | 39 | 1369 | 31 |
| 55       | 93.32  | 163.05 | 0.57 | 0.0877 | 0.0038 | 2.8356 | 0.1313 | 0.2344 | 0.0058 | 1376 | 78  | 1365 | 35 | 1358 | 30 |
| 56       | 264.96 | 370.47 | 0.72 | 0.0877 | 0.0037 | 2.8104 | 0.1251 | 0.2325 | 0.0057 | 1375 | 79  | 1358 | 33 | 1347 | 30 |
| 57       | 306.07 | 321.07 | 0.95 | 0.0875 | 0.0038 | 2.8684 | 0.1305 | 0.2376 | 0.0058 | 1373 | 85  | 1374 | 34 | 1374 | 30 |
| 58       | 171.08 | 302.21 | 0.57 | 0.0876 | 0.0026 | 2.6877 | 0.0891 | 0.2226 | 0.0050 | 1373 | 55  | 1325 | 25 | 1296 | 26 |
| 59       | 138.66 | 157.30 | 0.88 | 0.0874 | 0.0040 | 2.8564 | 0.1367 | 0.2369 | 0.0059 | 1370 | 83  | 1370 | 36 | 1371 | 30 |
| 60       | 169.48 | 294.86 | 0.57 | 0.0873 | 0.0038 | 2.7650 | 0.1261 | 0.2296 | 0.0056 | 1368 | 79  | 1346 | 34 | 1333 | 29 |
| 61       | 120.84 | 286.00 | 0.42 | 0.0873 | 0.0037 | 2.8776 | 0.1301 | 0.2391 | 0.0059 | 1367 | 75  | 1376 | 34 | 1382 | 30 |
| 62       | 61.75  | 118.13 | 0.52 | 0.0873 | 0.0040 | 2.7676 | 0.1333 | 0.2300 | 0.0057 | 1367 | 87  | 1347 | 36 | 1334 | 30 |
| 63       | 241.56 | 215.10 | 1.12 | 0.0871 | 0.0037 | 2.5959 | 0.1183 | 0.2161 | 0.0053 | 1363 | 76  | 1299 | 33 | 1261 | 28 |
| 64       | 78.97  | 114.81 | 0.69 | 0.0870 | 0.0042 | 2.7920 | 0.1403 | 0.2328 | 0.0058 | 1360 | 89  | 1353 | 38 | 1349 | 31 |
| 65       | 335.52 | 404.60 | 0.83 | 0.0869 | 0.0036 | 2.8255 | 0.1257 | 0.2358 | 0.0057 | 1359 | 82  | 1362 | 33 | 1365 | 30 |
| 66       | 339.61 | 373.13 | 0.91 | 0.0868 | 0.0036 | 2.7488 | 0.1216 | 0.2296 | 0.0056 | 1357 | 77  | 1342 | 33 | 1332 | 29 |
| 67       | 71.72  | 95.51  | 0.75 | 0.0867 | 0.0041 | 2.7733 | 0.1385 | 0.2319 | 0.0059 | 1355 | 82  | 1348 | 37 | 1344 | 31 |
| 68       | 80.22  | 87.46  | 0.92 | 0.0867 | 0.0032 | 2.7719 | 0.1055 | 0.2318 | 0.0054 | 1354 | 66  | 1348 | 28 | 1344 | 28 |
| 69       | 221.43 | 414.17 | 0.53 | 0.0867 | 0.0036 | 2.7237 | 0.1205 | 0.2279 | 0.0055 | 1353 | 75  | 1335 | 33 | 1323 | 29 |
| 70       | 48.61  | 117.84 | 0.41 | 0.0865 | 0.0040 | 2.8349 | 0.1363 | 0.2377 | 0.0060 | 1349 | 86  | 1365 | 36 | 1375 | 31 |
| 71       | 58.60  | 107.37 | 0.55 | 0.0864 | 0.0039 | 2.6647 | 0.1272 | 0.2236 | 0.0055 | 1348 | 88  | 1319 | 35 | 1301 | 29 |
| 72       | 96.64  | 165.35 | 0.58 | 0.0864 | 0.0038 | 2.7697 | 0.1296 | 0.2325 | 0.0058 | 1347 | 74  | 1347 | 35 | 1348 | 30 |
| 73       | 176.22 | 346.15 | 0.51 | 0.0859 | 0.0036 | 2.7735 | 0.1239 | 0.2342 | 0.0057 | 1336 | 78  | 1348 | 33 | 1356 | 30 |
| 74       | 101.28 | 86.22  | 1.17 | 0.0858 | 0.0042 | 2.6602 | 0.1366 | 0.2248 | 0.0057 | 1334 | 97  | 1317 | 38 | 1307 | 30 |
| 75       | 185.99 | 242.72 | 0.77 | 0.0853 | 0.0036 | 2.6669 | 0.1207 | 0.2268 | 0.0056 | 1322 | 86  | 1319 | 33 | 1318 | 29 |
| 76       | 71.17  | 121.33 | 0.59 | 0.0852 | 0.0039 | 2.4929 | 0.1206 | 0.2122 | 0.0053 | 1321 | 84  | 1270 | 35 | 1240 | 28 |
| 77       | 26.60  | 46.87  | 0.57 | 0.0851 | 0.0051 | 2.7451 | 0.1636 | 0.2339 | 0.0062 | 1319 | 116 | 1341 | 44 | 1355 | 33 |
| 78       | 57.09  | 108.76 | 0.52 | 0.0851 | 0.0040 | 2.7329 | 0.1341 | 0.2328 | 0.0058 | 1319 | 87  | 1337 | 36 | 1349 | 30 |
| 79       | 55.74  | 173.07 | 0.32 | 0.0851 | 0.0038 | 2.9025 | 0.1373 | 0.2474 | 0.0063 | 1318 | 84  | 1383 | 36 | 1425 | 32 |
| 80       | 111.38 | 147.09 | 0.76 | 0.0851 | 0.0037 | 2.6562 | 0.1227 | 0.2264 | 0.0055 | 1318 | 84  | 1316 | 34 | 1315 | 29 |

|           |    |         |         |      |        |        |        |        |        |        |      |     |      |    |      |    |
|-----------|----|---------|---------|------|--------|--------|--------|--------|--------|--------|------|-----|------|----|------|----|
|           | 81 | 124.75  | 140.57  | 0.89 | 0.0851 | 0.0038 | 2.8697 | 0.1347 | 0.2446 | 0.0061 | 1317 | 87  | 1374 | 35 | 1411 | 31 |
|           | 82 | 46.72   | 111.92  | 0.42 | 0.0848 | 0.0039 | 2.7095 | 0.1301 | 0.2318 | 0.0057 | 1311 | 86  | 1331 | 36 | 1344 | 30 |
|           | 83 | 56.43   | 88.94   | 0.63 | 0.0845 | 0.0039 | 2.7509 | 0.1334 | 0.2360 | 0.0059 | 1305 | 86  | 1342 | 36 | 1366 | 31 |
|           | 84 | 114.57  | 141.30  | 0.81 | 0.0841 | 0.0040 | 2.7436 | 0.1349 | 0.2365 | 0.0059 | 1296 | 88  | 1340 | 37 | 1368 | 31 |
|           | 85 | 217.57  | 328.99  | 0.66 | 0.0840 | 0.0038 | 2.4096 | 0.1134 | 0.2082 | 0.0053 | 1291 | 85  | 1245 | 34 | 1219 | 29 |
| Group-V   | 86 | 97.15   | 135.45  | 0.72 | 0.0891 | 0.0033 | 1.8728 | 0.0727 | 0.1525 | 0.0035 | 1405 | 67  | 1072 | 26 | 915  | 19 |
|           | 87 | 63.91   | 515.84  | 0.12 | 0.1216 | 0.0057 | 2.5234 | 0.1435 | 0.1506 | 0.0042 | 1979 | 81  | 1279 | 41 | 904  | 23 |
|           | 88 | 161.90  | 468.02  | 0.35 | 0.0735 | 0.0036 | 1.5037 | 0.0913 | 0.1484 | 0.0036 | 1027 | 106 | 932  | 37 | 892  | 20 |
|           | 89 | 85.65   | 131.17  | 0.65 | 0.0699 | 0.0035 | 1.2908 | 0.0673 | 0.1339 | 0.0035 | 926  | 100 | 842  | 30 | 810  | 20 |
| Group-VI  | 90 | 27.24   | 283.39  | 0.10 | 0.0603 | 0.0038 | 0.5693 | 0.0398 | 0.0685 | 0.0016 | 613  | 126 | 458  | 26 | 427  | 9  |
|           | 91 | 28.96   | 226.87  | 0.13 | 0.0587 | 0.0057 | 0.5384 | 0.0571 | 0.0665 | 0.0021 | 556  | 209 | 437  | 38 | 415  | 12 |
| <hr/>     |    |         |         |      |        |        |        |        |        |        |      |     |      |    |      |    |
| ZT006     |    |         |         |      |        |        |        |        |        |        |      |     |      |    |      |    |
| Group-I   | 1  | 136.00  | 152.52  | 0.89 | 0.1281 | 0.0044 | 5.8394 | 0.2359 | 0.3305 | 0.0072 | 2072 | 60  | 1952 | 35 | 1841 | 35 |
|           | 2  | 124.60  | 140.59  | 0.89 | 0.1229 | 0.0044 | 5.6458 | 0.2357 | 0.3332 | 0.0073 | 1999 | 64  | 1923 | 36 | 1854 | 35 |
|           | 3  | 211.28  | 544.55  | 0.39 | 0.1164 | 0.0037 | 4.2110 | 0.2131 | 0.2623 | 0.0077 | 1902 | 58  | 1676 | 42 | 1502 | 39 |
| Group-II  | 4  | 21.14   | 28.56   | 0.74 | 0.0850 | 0.0055 | 3.0119 | 0.2127 | 0.2571 | 0.0070 | 1315 | 135 | 1411 | 54 | 1475 | 36 |
|           | 5  | 195.62  | 506.38  | 0.39 | 0.0817 | 0.0059 | 1.9168 | 0.1292 | 0.1702 | 0.0041 | 1238 | 145 | 1087 | 45 | 1013 | 23 |
|           | 5  | 195.62  | 506.38  | 0.39 | 0.0817 | 0.0059 | 1.9168 | 0.1292 | 0.1702 | 0.0041 | 1238 | 145 | 1087 | 45 | 1013 | 23 |
| Group-III | 6  | 138.72  | 466.87  | 0.30 | 0.0863 | 0.0043 | 1.6752 | 0.1057 | 0.1409 | 0.0036 | 1344 | 95  | 999  | 40 | 850  | 21 |
|           | 7  | 398.18  | 233.82  | 1.70 | 0.0678 | 0.0029 | 1.2886 | 0.0631 | 0.1379 | 0.0032 | 862  | 91  | 841  | 28 | 833  | 18 |
|           | 8  | 107.86  | 113.91  | 0.95 | 0.0636 | 0.0036 | 1.1620 | 0.0712 | 0.1325 | 0.0033 | 729  | 122 | 783  | 33 | 802  | 19 |
|           | 9  | 183.06  | 901.50  | 0.20 | 0.0974 | 0.0036 | 1.7457 | 0.0926 | 0.1301 | 0.0033 | 1574 | 62  | 1026 | 34 | 788  | 19 |
|           | 10 | 518.83  | 350.45  | 1.48 | 0.0693 | 0.0029 | 1.2377 | 0.0582 | 0.1295 | 0.0029 | 909  | 88  | 818  | 26 | 785  | 16 |
|           | 11 | 360.98  | 289.40  | 1.25 | 0.0679 | 0.0029 | 1.1659 | 0.0559 | 0.1246 | 0.0027 | 865  | 90  | 785  | 26 | 757  | 16 |
|           | 12 | 622.30  | 510.15  | 1.22 | 0.0667 | 0.0028 | 1.1349 | 0.0541 | 0.1234 | 0.0028 | 828  | 90  | 770  | 26 | 750  | 16 |
|           | 13 | 106.62  | 181.81  | 0.59 | 0.0715 | 0.0038 | 1.2103 | 0.0697 | 0.1228 | 0.0029 | 971  | 116 | 805  | 32 | 747  | 17 |
|           | 14 | 84.83   | 136.08  | 0.62 | 0.0704 | 0.0039 | 1.1871 | 0.0713 | 0.1222 | 0.0030 | 941  | 118 | 795  | 33 | 743  | 17 |
|           | 15 | 195.81  | 220.56  | 0.89 | 0.0648 | 0.0032 | 1.0086 | 0.0551 | 0.1130 | 0.0026 | 767  | 107 | 708  | 28 | 690  | 15 |
| Group-IV  | 16 | 830.83  | 626.91  | 1.33 | 0.0660 | 0.0028 | 0.6960 | 0.0329 | 0.0764 | 0.0017 | 807  | 87  | 536  | 20 | 475  | 10 |
|           | 17 | 172.46  | 351.09  | 0.49 | 0.0660 | 0.0028 | 0.6799 | 0.0338 | 0.0747 | 0.0020 | 806  | 84  | 527  | 20 | 465  | 12 |
|           | 18 | 455.23  | 666.21  | 0.68 | 0.0658 | 0.0024 | 0.6711 | 0.0297 | 0.0739 | 0.0018 | 801  | 73  | 521  | 18 | 460  | 11 |
|           | 19 | 289.26  | 552.10  | 0.52 | 0.0669 | 0.0026 | 0.6613 | 0.0302 | 0.0717 | 0.0018 | 836  | 75  | 515  | 18 | 446  | 11 |
|           | 20 | 356.03  | 1369.38 | 0.26 | 0.0548 | 0.0038 | 0.5382 | 0.0351 | 0.0712 | 0.0017 | 405  | 160 | 437  | 23 | 443  | 10 |
|           | 21 | 1546.51 | 1289.64 | 1.20 | 0.0666 | 0.0024 | 0.6442 | 0.0279 | 0.0702 | 0.0017 | 825  | 74  | 505  | 17 | 437  | 10 |
|           | 22 | 682.29  | 922.59  | 0.74 | 0.0688 | 0.0026 | 0.6360 | 0.0287 | 0.0670 | 0.0017 | 893  | 73  | 500  | 18 | 418  | 10 |
|           | 16 | 830.83  | 626.91  | 1.33 | 0.0660 | 0.0028 | 0.6960 | 0.0329 | 0.0764 | 0.0017 | 807  | 87  | 536  | 20 | 475  | 10 |
|           | 17 | 172.46  | 351.09  | 0.49 | 0.0660 | 0.0028 | 0.6799 | 0.0338 | 0.0747 | 0.0020 | 806  | 84  | 527  | 20 | 465  | 12 |
|           | 18 | 455.23  | 666.21  | 0.68 | 0.0658 | 0.0024 | 0.6711 | 0.0297 | 0.0739 | 0.0018 | 801  | 73  | 521  | 18 | 460  | 11 |

|         |         |         |      |        |        |        |        |        |        |     |     |     |    |     |    |
|---------|---------|---------|------|--------|--------|--------|--------|--------|--------|-----|-----|-----|----|-----|----|
| 19      | 289.26  | 552.10  | 0.52 | 0.0669 | 0.0026 | 0.6613 | 0.0302 | 0.0717 | 0.0018 | 836 | 75  | 515 | 18 | 446 | 11 |
| 20      | 356.03  | 1369.38 | 0.26 | 0.0548 | 0.0038 | 0.5382 | 0.0351 | 0.0712 | 0.0017 | 405 | 160 | 437 | 23 | 443 | 10 |
| 21      | 1546.51 | 1289.64 | 1.20 | 0.0666 | 0.0024 | 0.6442 | 0.0279 | 0.0702 | 0.0017 | 825 | 74  | 505 | 17 | 437 | 10 |
| 22      | 682.29  | 922.59  | 0.74 | 0.0688 | 0.0026 | 0.6360 | 0.0287 | 0.0670 | 0.0017 | 893 | 73  | 500 | 18 | 418 | 10 |
| Group-V |         |         |      |        |        |        |        |        |        |     |     |     |    |     |    |
| 23      | 53.56   | 809.07  | 0.07 | 0.0606 | 0.0024 | 0.3422 | 0.0162 | 0.0410 | 0.0011 | 624 | 81  | 299 | 12 | 259 | 6  |
| 24      | 30.81   | 782.77  | 0.04 | 0.0468 | 0.0028 | 0.2639 | 0.0197 | 0.0409 | 0.0012 | 39  | 127 | 238 | 16 | 258 | 7  |
| 25      | 38.48   | 931.74  | 0.04 | 0.0645 | 0.0033 | 0.3424 | 0.0190 | 0.0385 | 0.0011 | 757 | 105 | 299 | 14 | 244 | 7  |
| 26      | 48.44   | 604.70  | 0.08 | 0.0462 | 0.0037 | 0.2422 | 0.0215 | 0.0380 | 0.0010 | 10  | 152 | 220 | 18 | 240 | 6  |
| 27      | 33.40   | 834.09  | 0.04 | 0.0650 | 0.0028 | 0.3371 | 0.0166 | 0.0376 | 0.0010 | 775 | 89  | 295 | 13 | 238 | 6  |
| 28      | 39.58   | 834.73  | 0.05 | 0.0549 | 0.0021 | 0.2778 | 0.0139 | 0.0367 | 0.0011 | 407 | 83  | 249 | 11 | 232 | 7  |
| 29      | 55.78   | 1054.35 | 0.05 | 0.0537 | 0.0030 | 0.2673 | 0.0186 | 0.0361 | 0.0011 | 360 | 124 | 241 | 15 | 228 | 7  |
| 30      | 3.33    | 852.84  | 0.00 | 0.0560 | 0.0030 | 0.2771 | 0.0163 | 0.0359 | 0.0008 | 454 | 123 | 248 | 13 | 227 | 5  |
| 31      | 10.60   | 809.96  | 0.01 | 0.0492 | 0.0046 | 0.2388 | 0.0253 | 0.0352 | 0.0010 | 156 | 209 | 217 | 21 | 223 | 6  |
| 32      | 25.15   | 573.58  | 0.04 | 0.0471 | 0.0027 | 0.2288 | 0.0143 | 0.0353 | 0.0009 | 52  | 113 | 209 | 12 | 223 | 6  |
| 33      | 5.96    | 753.28  | 0.01 | 0.0571 | 0.0028 | 0.2754 | 0.0156 | 0.0350 | 0.0010 | 495 | 112 | 247 | 12 | 222 | 6  |
| 34      | 17.19   | 653.17  | 0.03 | 0.0612 | 0.0029 | 0.2953 | 0.0153 | 0.0350 | 0.0009 | 646 | 103 | 263 | 12 | 222 | 5  |
| 35      | 13.87   | 573.19  | 0.02 | 0.0550 | 0.0026 | 0.2622 | 0.0143 | 0.0346 | 0.0009 | 411 | 105 | 236 | 12 | 219 | 6  |
| 36      | 3.65    | 800.09  | 0.00 | 0.0541 | 0.0031 | 0.2505 | 0.0132 | 0.0336 | 0.0007 | 375 | 132 | 227 | 11 | 213 | 5  |
| 37      | 7.69    | 677.13  | 0.01 | 0.0697 | 0.0035 | 0.3230 | 0.0182 | 0.0336 | 0.0009 | 918 | 97  | 284 | 14 | 213 | 6  |
| 38      | 3.21    | 902.13  | 0.00 | 0.0539 | 0.0026 | 0.2471 | 0.0131 | 0.0333 | 0.0007 | 365 | 113 | 224 | 11 | 211 | 5  |
| 39      | 13.69   | 1266.60 | 0.01 | 0.0522 | 0.0022 | 0.2391 | 0.0115 | 0.0332 | 0.0009 | 295 | 91  | 218 | 9  | 211 | 5  |
| 40      | 4.03    | 930.18  | 0.00 | 0.0529 | 0.0028 | 0.2428 | 0.0143 | 0.0333 | 0.0008 | 322 | 111 | 221 | 12 | 211 | 5  |
| 41      | 2.01    | 799.26  | 0.00 | 0.0509 | 0.0026 | 0.2325 | 0.0129 | 0.0331 | 0.0008 | 238 | 119 | 212 | 11 | 210 | 5  |
| 42      | 10.22   | 524.07  | 0.02 | 0.0551 | 0.0040 | 0.2518 | 0.0172 | 0.0331 | 0.0008 | 417 | 166 | 228 | 14 | 210 | 5  |
| 43      | 10.31   | 744.05  | 0.01 | 0.0506 | 0.0029 | 0.2226 | 0.0144 | 0.0319 | 0.0009 | 222 | 132 | 204 | 12 | 202 | 6  |
| 44      | 4.31    | 1417.06 | 0.00 | 0.0481 | 0.0023 | 0.2053 | 0.0108 | 0.0310 | 0.0007 | 105 | 103 | 190 | 9  | 196 | 4  |
| 45      | 5.89    | 1226.29 | 0.00 | 0.0513 | 0.0030 | 0.2111 | 0.0148 | 0.0299 | 0.0008 | 254 | 134 | 194 | 12 | 190 | 5  |
